# Supplementary material for: Kinetic and spectroscopic studies on the chiral self-aggregation of amphiphilic zinc and copper (l)-prolinate-tetraarylporphyrin derivatives in different aqueous media
Source: Royal Society of Chemistry journal article supplement (doi:10.1039/c8ob02689k), 2019-01-01
Supplement: c8ob02689k1.pdf [file c8ob02689k1.pdf]

## Kinetic and spectroscopic studies on the chiral self-aggregation of amphiphilic zinc and copper (L)-prolinate-tetraarylporphyrin derivatives in different aqueous media

Fabrizio Caroleo, Manuela Stefanelli,\* Gabriele Magna, Mariano Venanzi, Roberto Paolesse, Simona Sennato, Marilena Carbone and Donato Monti \*

Electronic Supplementary Informations (ESI)

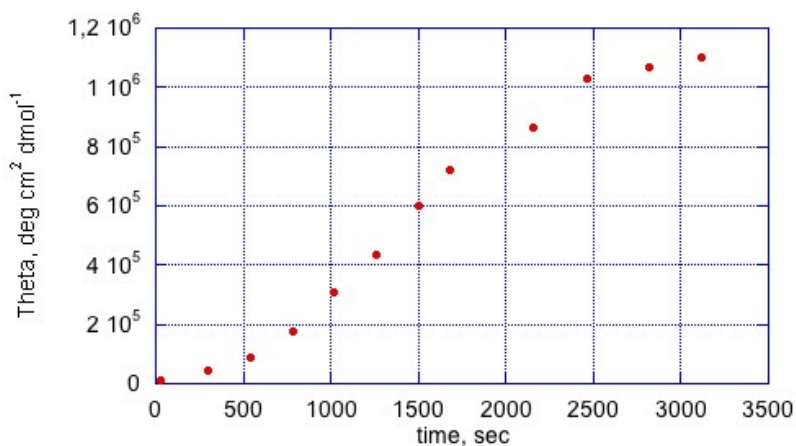

Figure S1. Kinetic profile for the aggregation of **CuPL(+)**  $2.8 \times 10^{-6}$  M in EtOH/H<sub>2</sub>O 30% v:v. CD spectral pattern variation at  $\lambda = 419$  nm.

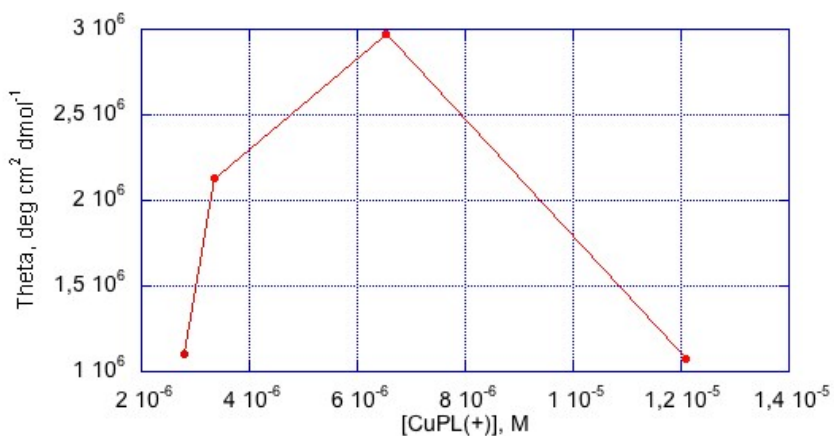

Figure S2. Theta molar values as a function of the initial concentration of **CuPL(+)** (EtOH/H<sub>2</sub>O 30% v:v).

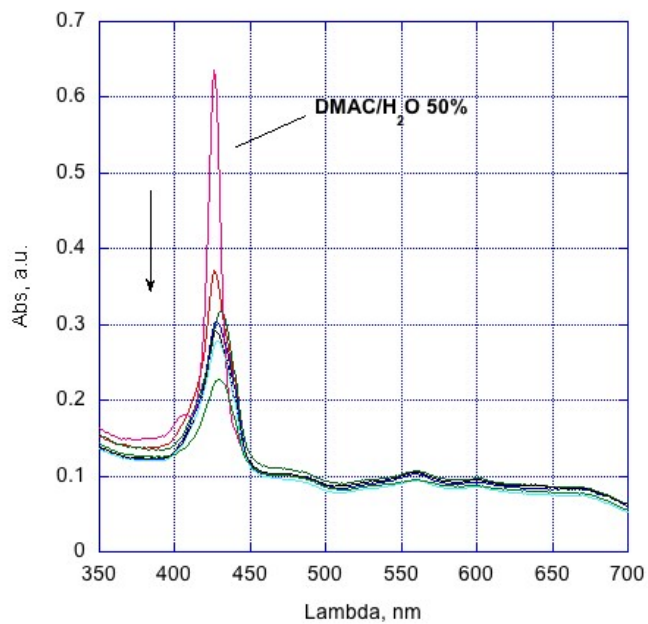

Figure S3. UV-Vis spectra variations with time of **ZnPL(+)** in DMAC/H<sub>2</sub>O 30% v:v.

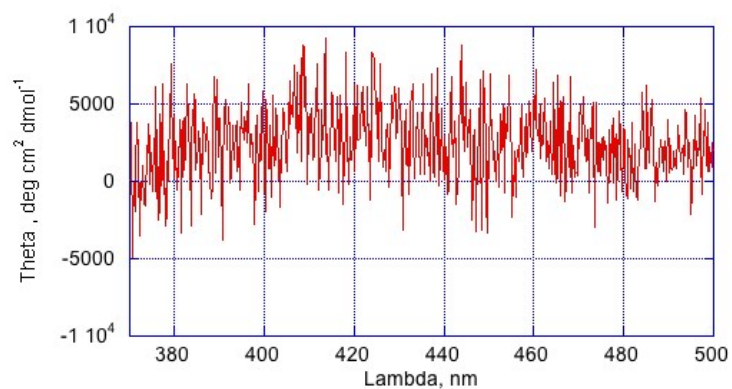

Figure S4. CD spectra of **ZnPL(+)** (final aggregates) in DMAC/H<sub>2</sub>O 30% v:v.

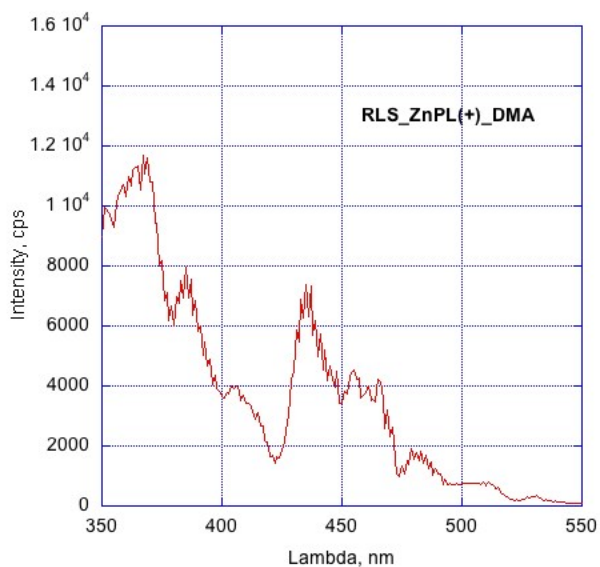

Figure S5. RLS spectra (final aggregates) of **ZnPL(+)** in DMAC/H<sub>2</sub>O 30% v:v at  $3.5 \times 10^{-6}$  M

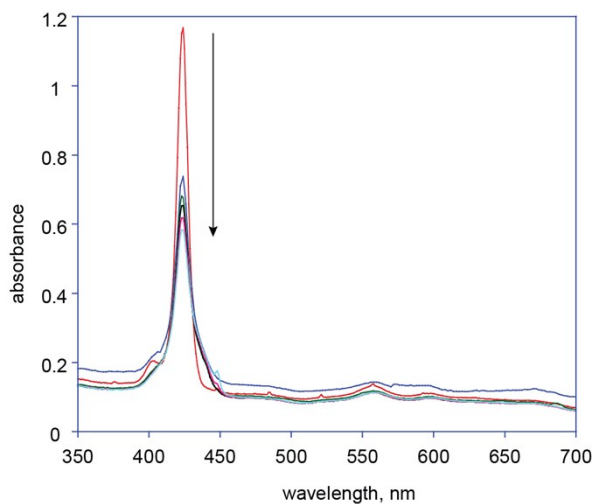

Figure S6. UV-Vis spectra variations with time of **ZnPL(+)** in WtOH/H<sub>2</sub>O 30% v:v.

$$\text{Eq. S1. } [\text{Ext}_t] = [\text{Ext}_\infty] + ([\text{Ext}_0] - [\text{Ext}_\infty]) \left\{ (1 + (m-1) [k_0 t + (n+1)^{-1} (k_{\text{cat}} t)^{n+1}]^{-1/ (m-1)} \right\}$$

$$\text{Eq. S2. } \text{Ext}_t = \text{Ext}_\infty + (\text{Ext}_0 - \text{Ext}_\infty) [\exp(-kt)]$$
